# Supplementary material for: CBD Reverts the Mesenchymal Invasive Phenotype of Breast Cancer Cells Induced by the Inflammatory Cytokine IL-1β
Source: MDPI journal article supplement (doi:10.3390/ijms21072429), 2020-03-31
Supplement: s1 [file s1]

**Table S1.** Selected Primers for quantitative RT-PCR.

| <i>GENE (ID)</i>                             | <b>Product name</b> | <b>PRIMER SEQUENCE (5' - 3')<sup>a</sup></b>                           | <b>AMPLICON (bp)</b> | <b>Reference</b> |
|----------------------------------------------|---------------------|------------------------------------------------------------------------|----------------------|------------------|
| <b><i>CNR1</i></b><br>( <i>NM_016083</i> )   | CB1                 | F: ATG TGG ACC ATA GCC ATT GTG<br>R: CCG ATC CAG AAC ATC AGG TAG G     | 125                  | [30]             |
| <b><i>CDH1</i></b><br>( <i>AB025106</i> )    | E-Cadherin          | F: GCT GGA GAT TAA TCC GGA CA<br>R: ACC TGA GGC TTT GGA TTC CT         | 237                  | This study       |
| <b><i>CTNNB1</i></b><br>( <i>NM_001904</i> ) | β-Catenin           | F: CCT GAG GAA GAG GAT GTG GA<br>R: GCC AAA CGC TGG ACA TTA GT         | 224                  | This study       |
| <b><i>TP63</i></b><br>( <i>NM_003722</i> )   | TP63                | F: GTC ATT TGA TTC GAG TAG AGG GG<br>R: CTG GGG TGG CTC ATA AGG T      | 98                   | [30]             |
| <b><i>BIRC3</i></b><br>( <i>NM_001165</i> )  | BIRC3               | F: TTT CCG TGG CTC TTA TTC AAA CT<br>R: GCA CAG TGG TAG GAA CTT CTC AT | 96                   | [30]             |
| <b><i>ID-1</i></b><br>( <i>NM_002165</i> )   | ID-1                | F: CTG CTC TAC GAC ATG AAC GG<br>R: GAA GGT CCC TGA TGT AGT CGA T      | 124                  | [30]             |
| <b><i>RPLP0</i></b><br>( <i>NM_001002</i> )  | RPLP0               | F: AGC CCA GAA CAC TGG TCT C<br>R: ACT CAG GAT TTC AAT GGT GCC         | 97                   | [5]              |

a, T<sub>m</sub> values for all primers 60°C
